# Supplementary material for: Myeloid Lineage Ablation of Phlpp1 Regulates M-CSF Signaling and Tempers Bone Resorption in Female Mice
Source: MDPI journal article supplement (doi:10.3390/ijms22189702), 2021-09-08
Supplement: s1 [file s1]

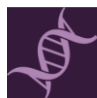

Supplementary

## Myeloid Lineage Ablation of *Phlpp1* Regulates M-CSF Signaling and Tempers Bone Resorption in Female Mice

Ismael Y. Karkache <sup>1</sup>, Jeyaram R. Damodaran <sup>1</sup>, David H. H. Molstad <sup>1</sup>, Kim C. Mansky <sup>2</sup>, and Elizabeth W. Bradley <sup>1,3,\*</sup>

<sup>1</sup> Department of Orthopedics, School of Medicine, University of Minnesota, Minneapolis, MN 55455, USA; karka010@umn.edu (I.Y.K.); damod015@umn.edu (J.R.D.); molst031@umn.edu (D.H.H.M.)

<sup>2</sup> Division of Orthodontics, Department of Developmental and Surgical Services, Institute for Virology, School of Dentistry; University of Minnesota, Minneapolis, MN 55455, USA, kmansky@umn.edu

<sup>3</sup> Stem Cell Institute, University of Minnesota, Minneapolis, MN 55455, USA

\* Correspondence: ebradle1@umn.edu

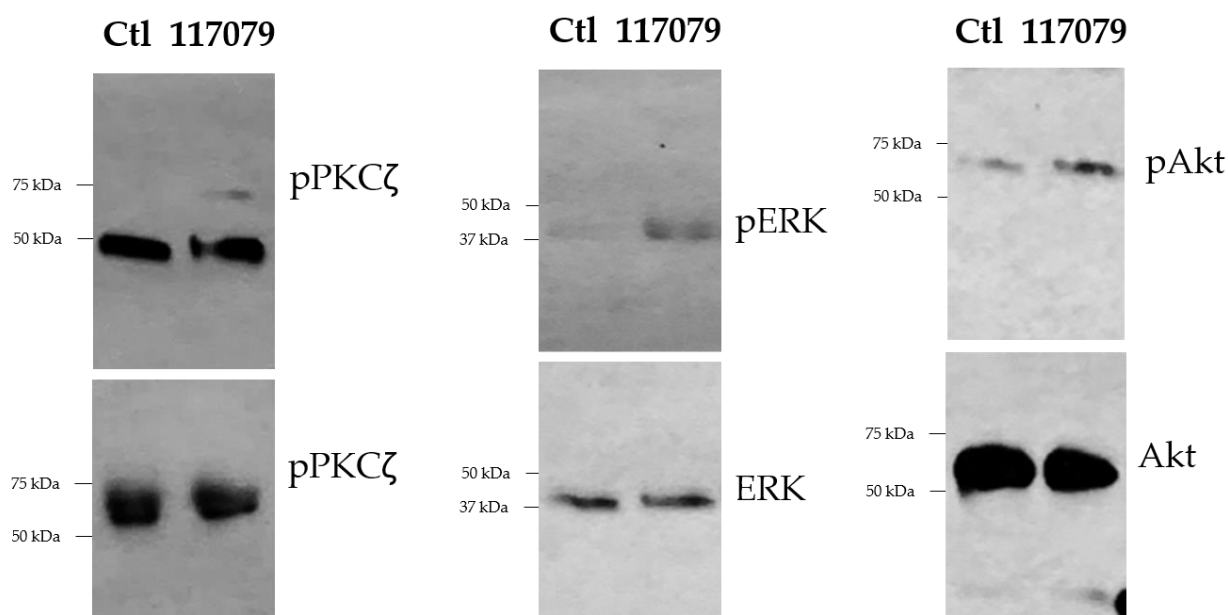

**Figure S1.** Uncropped blots from Figure 6D.
